# Supplementary material for: Overall process of using a valerate-dominant sludge hydrolysate to produce high-quality polyhydroxyalkanoates (PHA) in a mixed culture
Source: PubMed Central journal article supplement (PMC5537348; doi:10.1038/s41598-017-07154-3), 2017-07-31
Supplement: 41598_2017_7154_MOESM1_ESM.pdf [file 41598_2017_7154_MOESM1_ESM.pdf]

## Overall process of using a valerate-dominant sludge hydrolysate to produce high-quality polyhydroxyalkanoates (PHA) in a mixed culture

Jiuxiao Hao, Xiujin Wang, Hui Wang\*

*State Key Joint Laboratory of Environment Simulation and Pollution Control, School of Environment, Tsinghua University, Beijing 100084, China*

\*Corresponding author. E-mail: [wanghui@tsinghua.edu.cn](mailto:wanghui@tsinghua.edu.cn)

### Figures

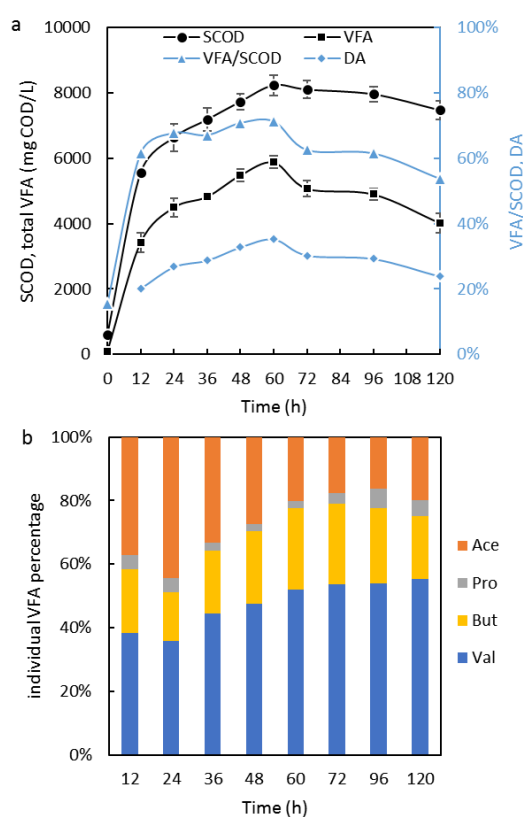

**Figure S1. SCOD, total VFAs production (a) and the composition of individual VFA (b) during 5-day sludge thermophilic anaerobic fermentation. Ace: acetate; Pro: propionate; But: butyrate; Val: valerate. (bars = S.D., n = 3)**

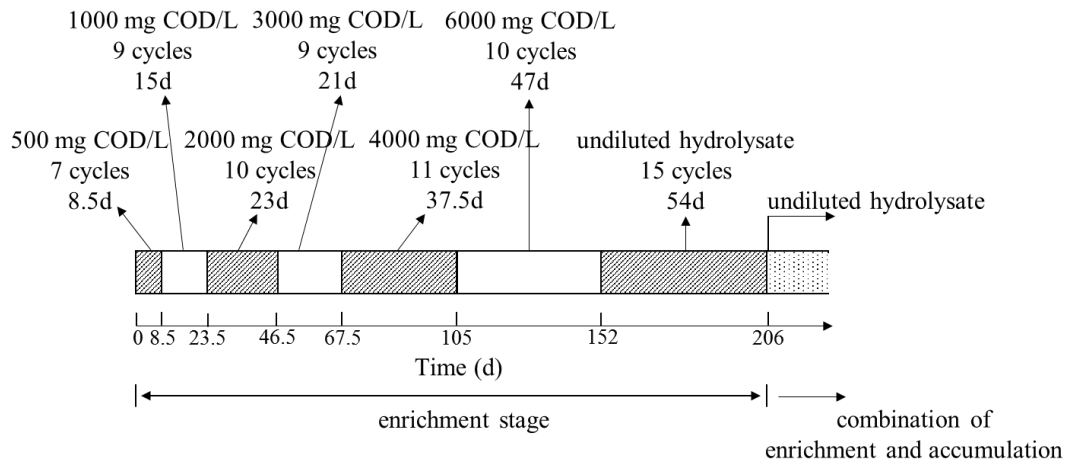

**Figure S2. The whole process and timeline of enriching PHA-producing MMC fed by valerate-dominant sludge hydrolysate with increasing initial concentrations. After day 206, the PHAs product could be recovered from each cycle at the end of feast phase.**

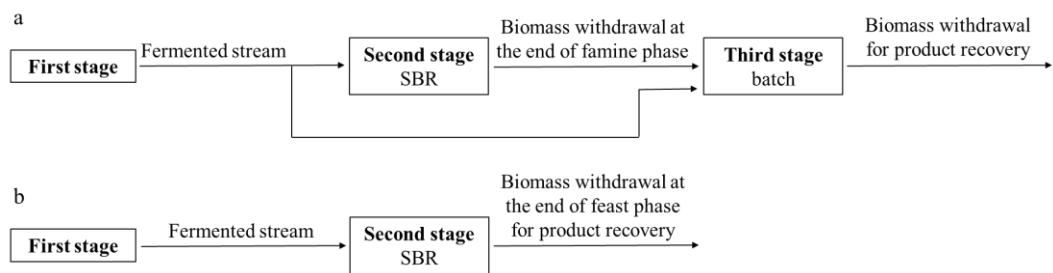

**Figure S3. Comparison of conventional three-stage process (a) and two-stage process in this study (b) for PHAs production.**
